# Supplementary material for: Self-assembled c-oriented Ni(OH)2 films for enhanced electrocatalytic activity towards the urea oxidation reaction
Source: RSC Adv. 2023 Oct 10;13(42):29625–31. doi: 10.1039/d3ra05538h (PMC10562896; doi:10.1039/d3ra05538h)
Supplement: RA-013-D3RA05538H-s001 [file RA-013-D3RA05538H-s001.pdf]

**Electronic Supplementary Information**

**Self-Assembled *c*-Oriented Ni(OH)<sub>2</sub> Films for Enhanced**

**Electrocatalytic Activity towards Urea Oxidation Reaction**

Xinwei Dong,\* Yansheng Liu, Jin Zhou, Guoxiao Xu, Fei Guo, Xiaobo Jia, and Zhiqiang Yu

*School of Electronic Engineering, Liuzhou Key Laboratory of New Energy Vehicle Power  
Lithium Battery, Guangxi University of Science and Technology, Liuzhou 545006, Guangxi, China.*

Figures S1-S8:

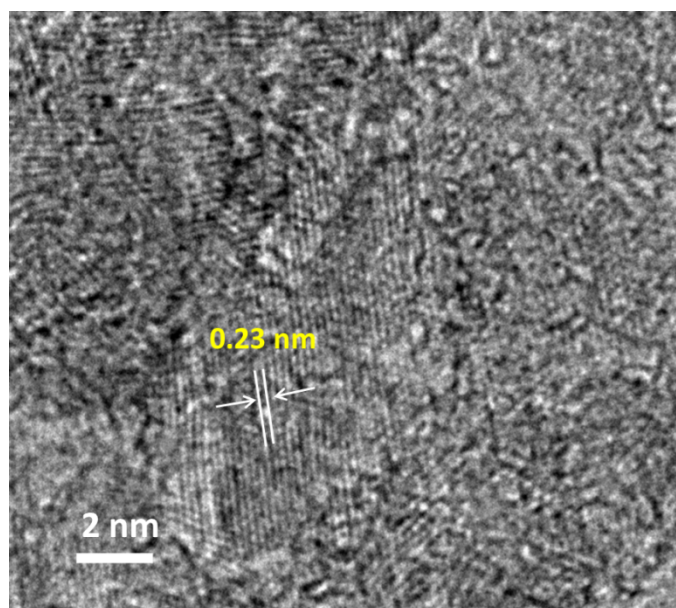

**Fig.S1** High-resolution TEM image of as-prepared Ni(OH)<sub>2</sub> nanosheets.

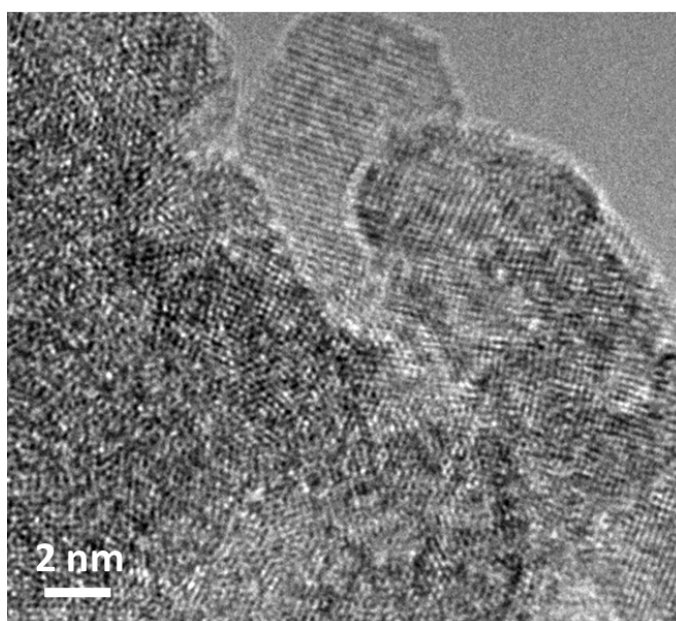

**Fig.S2** High-resolution TEM image of as-prepared Ni(OH)<sub>2</sub>-gP.

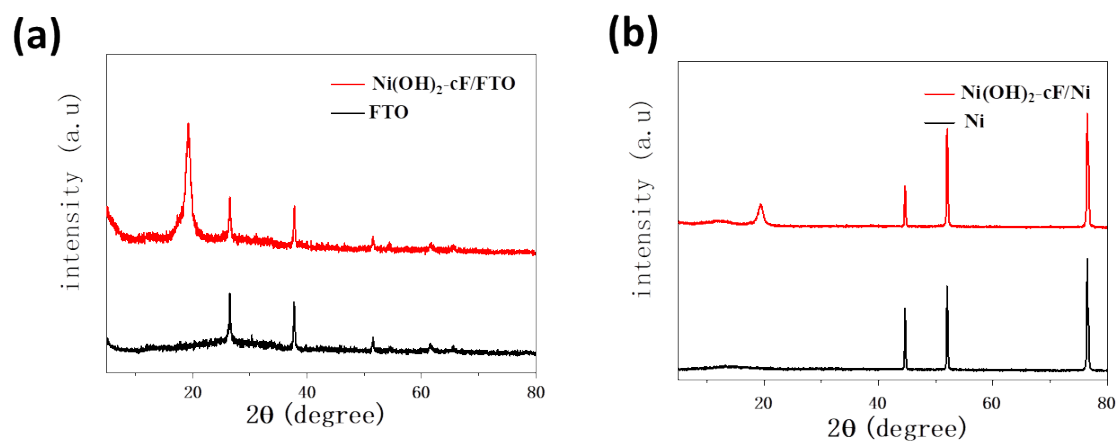

**Fig.S3** XRD of the as-prepared Ni(OH)<sub>2</sub>-cF on the (a) FTO substrate and (b) nickel foil.

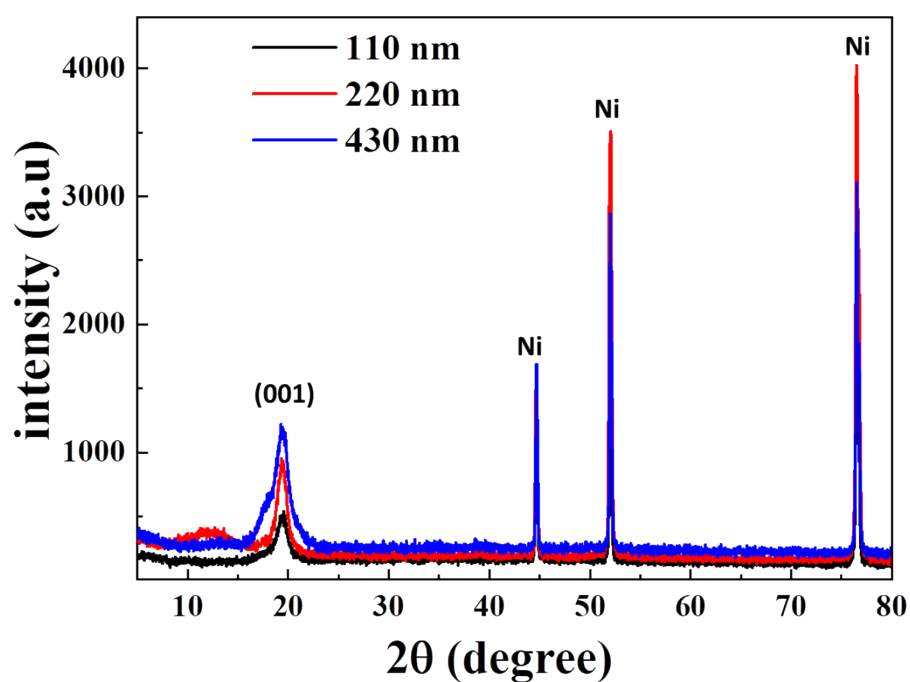

**Fig.S4** XRD of the as-prepared Ni(OH)<sub>2</sub>-cF with different thicknesses on the nickel foil.

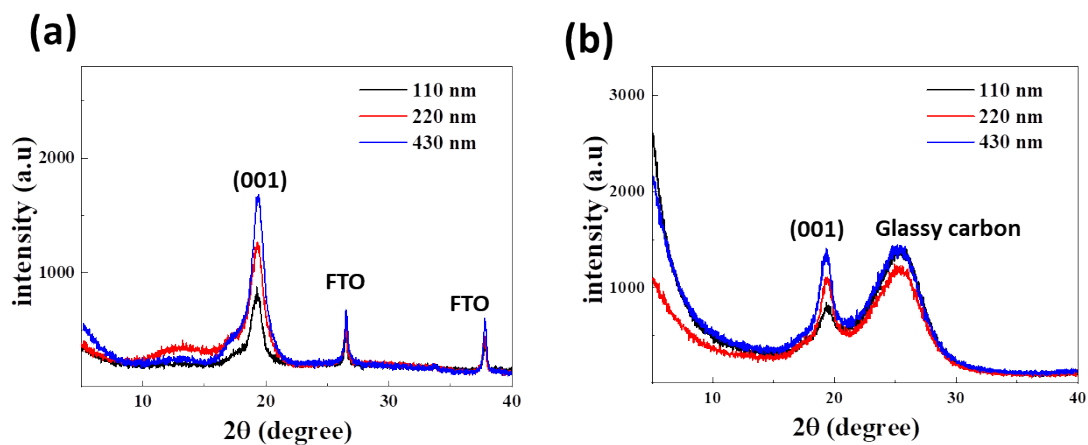

**Fig.S5** XRD of the as-prepared Ni(OH)<sub>2</sub>-cF with different thicknesses on the (a) FTO substrate and (b) glassy carbon.

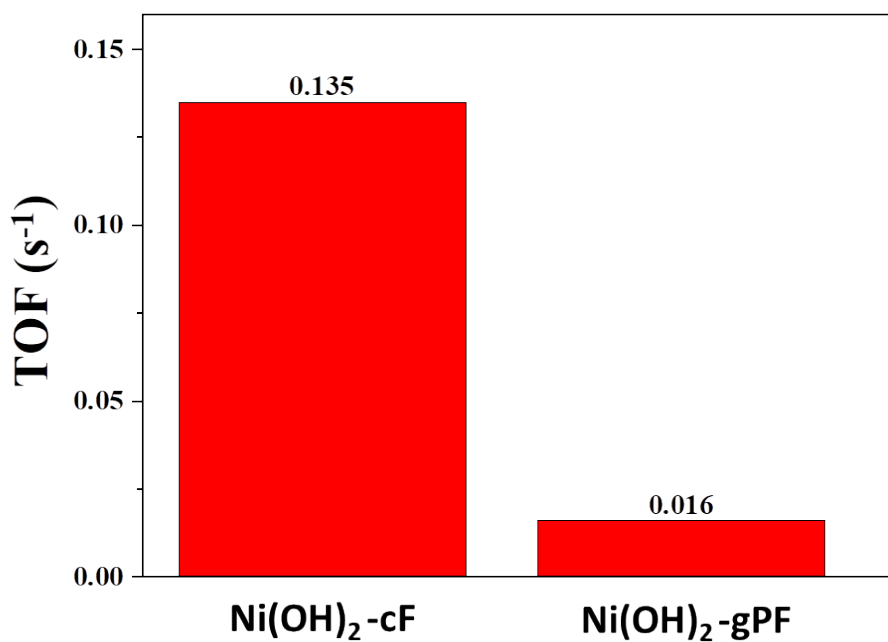

**Fig.S6** The TOF values of Ni(OH)<sub>2</sub>-cF and Ni(OH)<sub>2</sub>-gPF at  $\eta=260$  mV.

The TOF values (*Angewandte Chemie*, 2020, 132.21: 8149-8154) were calculated from the following equation:

$$TOF = J * A/4 * F * m$$

where J (A cm<sup>-2</sup>) is the current density at overpotential of 260 mV, A is the geometric surface area of the electrode, F is the faraday constant (96485 C mol<sup>-1</sup>), m is the mole number of Ni atoms in the catalyst.

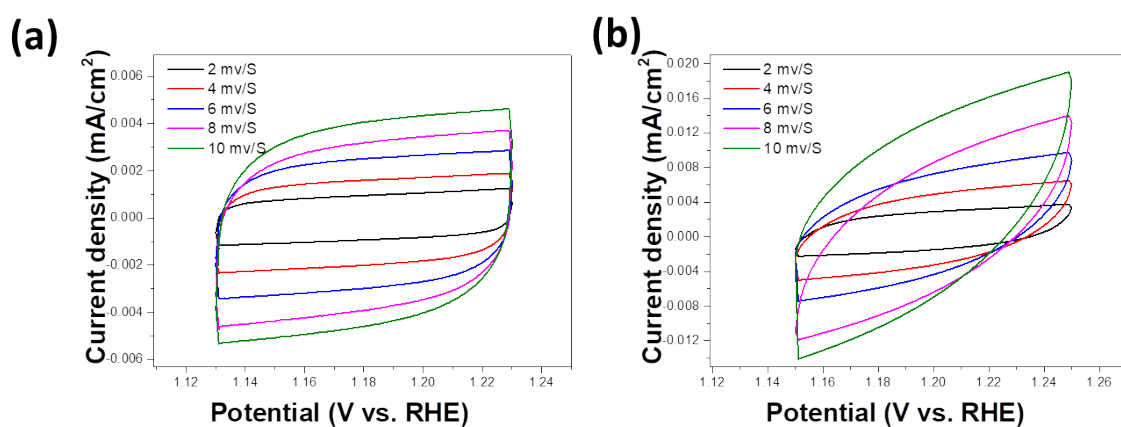

**Fig.S7** Typical CV curves at different scan rates of (a) Ni(OH)<sub>2</sub>-cF and (b) Ni(OH)<sub>2</sub>-gPF.

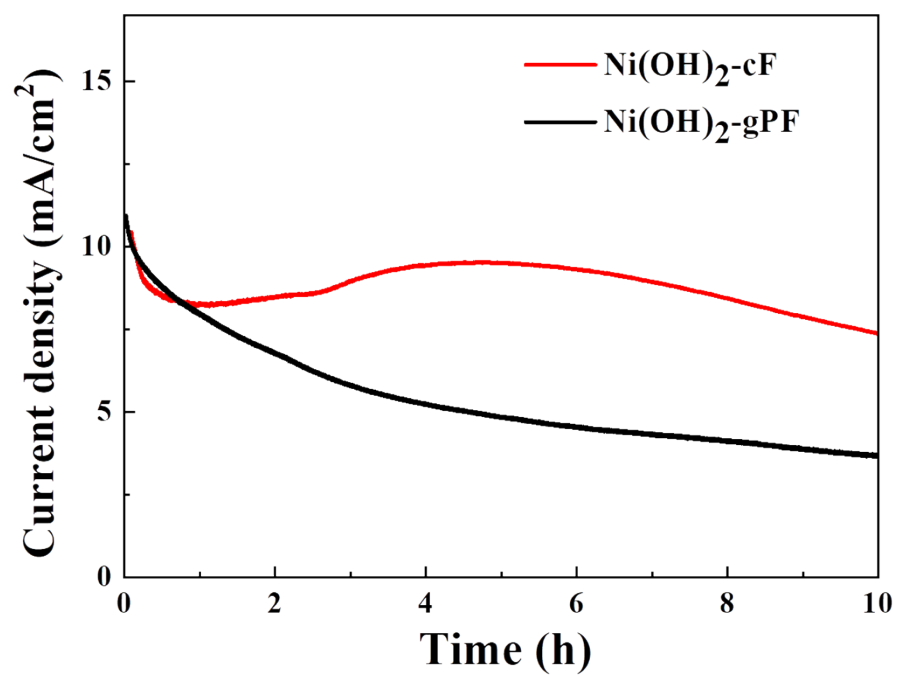

**Fig.S8** Chronoamperometry curves at 10  $\text{mA}/\text{cm}^2$  of  $\text{Ni(OH)}_2\text{-cF}$  and  $\text{Ni(OH)}_2\text{-gPF}$  on the nickel foils.
